# Supplementary material for: Role of D-GADD45 in JNK-Dependent Apoptosis and Regeneration in Drosophila
Source: PubMed Central journal article supplement (PMC6562583; doi:10.3390/genes10050378), 2019-05-18
Supplement: genes-10-00378-s001.pdf [file genes-10-00378-s001.pdf]

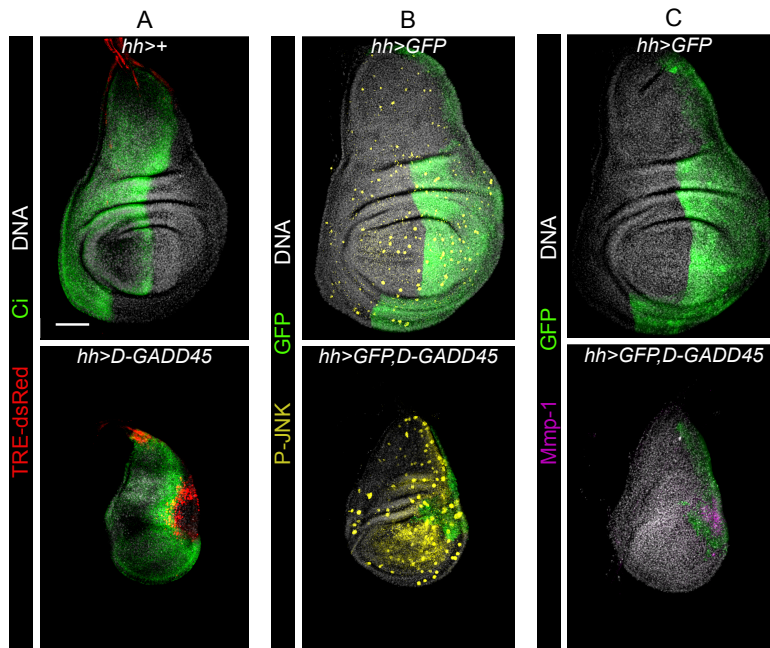

**Figure S1. Sustained expression of *D-GADD45* activates JNK.** Detection of JNK activity using the reporter line TRE-dsRed (A) and two different markers, P-JNK (B) and Mmp-1 (C). Green: anterior compartment (A), posterior compartment (B-C), white: DNA, red: TRE-dsRed, yellow: P-JNK and magenta: Mmp-1. Bar: 50 $\mu$ m. N  $\geq$  5 for each genotype
